# Supplementary material
Source: PubMed Central journal article supplement (PMC4260703)
Supplement: ismej201479x1.pdf [file ismej201479x1.pdf]

# 1 **Supporting Information**

2 **Walker *et al.***

## 3 **Materials and methods**

4 **Animals:** The C57BL/6J and C57BL/6N strains emerged from the ancestral C57BL/6  
5 in the 1940s. C57BL/6J and C57BL/6N mice were bred, housed and handled  
6 according to the federal animal welfare guidelines. Mouse husbandry was conducted  
7 under a continuously controlled hygiene standard according to the Federation of  
8 European Laboratory Animal Science Associations (FELASA). All mice were housed  
9 in techniplast cages under standard vivarium conditions (mean ambient temperature  
10 of  $21 \pm 1$  °C, 12:12 hours light: dark cycle) and had free access to food and water in  
11 the experiments. Genetic background characterization in tail-clip samples from  
12 C57BL/6N and C57BL/6J mice bred at our laboratory was performed by Taconic  
13 (New York, U.S.A). Illumina medium density SNP panel analysis confirmed 100.0%  
14 similarity to the respective genotype reference. Microarray analyses revealed a  
15 marked down regulation of nnt-transcripts in C57BL/6J livers compared to C57BL/6N.

## 16 **UPLC-TOF-MS/MS Experiments**

17 Further MS experiments were followed with pooled cecal samples in order to  
18 increase the concentration of metabolites. We evaluated the putative metabolites by  
19 applying MS/MS experiments with time of flight (TOF) mass spectrometer (MaXis)  
20 (Bruker Daltonics) coupled to the Ultraperformance Liquid Chromatography (UPLC)  
21 system (ACQUITY™; Waters, Milford, MA). Before analysis, the mass spectrometer  
22 was calibrated with 5 ppm of arginine solution. Before MS/MS analysis separation  
23 was performed using reverse chromatography with UPLC system. The fragmentation

24 experiments were exhibited in automated MS/MS mode of TOF system. Following  
25 parameters were applied: capillary voltage of 4000 V and end plate offset to -500 V,  
26 dry gas flow rate of 8 L/min, dry gas temperature to 200 °C, nebulizer gas flow rate of  
27 2.0 bar. The mass range was set from 50 to 1200 and scan rate of 5 Hz with a rolling  
28 average of 2 by acquiring profile spectra. The parameters for automated MS/MS  
29 fragmentation were set to a number of five precursor ions and an intensity cut-off  
30 >1000 with a collision energy range between 30 and 40 eV.

### 31 **Pre-processing and statistical analysis of metabolomics data**

32 Before statistically evaluating the experiment, we have adopted several pre-  
33 processing tasks. The spectra alignment leads to a sizable number of zero values  
34 associated to the variable mass signal. Thus, the variance of this variable needs to  
35 be stabilized excluding mass signal values occurring in less than 20% of all samples.  
36 The multivariate statistical analysis was performed with either SIMCA-P 12 (Umetrics,  
37 Umea, Sweden), Genedata Analyst 7.5 (Genedata Solution in Silico, Basel,  
38 Switzerland) or SAS (SAS Institute GmbH, Germany). Heatmap visualisation was  
39 performed using Hierarchical Clustering Explorer by normalizing each mass signals  
40 by the standard deviation (Jinwook and Shneiderman 2002). The so inferred  
41 discriminative variables/mass signals were uploaded into MasSTRIX (Suhre and  
42 Schmitt-Kopplin 2008). MasSTRIX enables to upload high precision mass spectrum  
43 data and assign the detected mass signals into metabolites, using the information of  
44 the theoretical monoisotopic masses within a selected error in ppm. The information  
45 of monoisotopic masses of metabolites is derived from different databases including  
46 KEGG (Kyoto Encyclopedia of Genes and Genomes), LIPID MAPS (LIPID  
47 Metabolites and Pathways Strategy) and HMDB (Human Metabolome Database)

48 (Kanehisa and Goto 2000, Sud et al 2007, Wishart et al 2009). Mass signals that  
49 were both significant and discriminative have been uploaded into MassTRIX, within  
50 an error range of 1 ppm for both modes. *Bacteriodes vulgatus* has been chosen as  
51 reference species in the KEGG database. The significance of the discriminative mass  
52 signals, derived from S-Plot was confirmed by using of a non-parametric statistical  
53 test (Wilcoxon-Mann-Whitney test with  $p < 0.05$ ).

54 Comparison of measured MS/MS data was done by using METLIN database, which  
55 also provides amongst metabolite annotation an extensive collection of MS/MS data  
56 for metabolites (Smith et al 2005). The annotation of selected parent ions was done  
57 within an error range of 10 ppm, searching and comparison of given MS/MS data  
58 was done visually. Molecular formula calculation of measured parent and fragment  
59 ions was performed using DataAnalysis Version 4.0 SP2 (Bruker Daltonik GmbH,  
60 Bremen, Germany).

## 61 **Elemental composition mass difference network analysis and visualization**

62 The calculation of molecular formulas and construction of connections due to  
63 preselected mass differences reference list was done by in-house software NetCalc  
64 (Tziotis et al 2011). In detail, for each mass signal, molecular formula was calculated,  
65 including carbon, hydrogen, oxygen, nitrogen, sulfur and phosphorus within an error  
66 of 0.2 ppm (CHNOSP). Mass signals with valid molecular formulas were taken for  
67 network visualization. Possible biochemical transformations (representing mass  
68 differences) such as hydroxylation, taurine or sulfate conjugation (OH: 15.994915  
69 (exact mass); C<sub>2</sub>H<sub>5</sub>NO<sub>2</sub>S: 107.00410; SO<sub>3</sub>: 79.95682) were calculated between mass  
70 signals with valid molecular formulas. All mass differences, taken for calculation are  
71 summarized in Table S4. The mass differences are subsequently used as

72 | connections between nodes (edges) and afterwards a construction of mass  
73 | difference network was possible. Network visualization was performed using Gephi  
74 | 0.8.1 beta version (Bastian et al 2009) by applying the ForceAtlas2 layout, which is  
75 | based on attraction and repulsion of nodes due to the number of found mass  
76 | differences, respectively.

# Results

## Identification of diphloretoylputrescine

As described in Materials and methods, we confirmed several metabolites by performing automated MS/MS experiments. We intentionally searched for all mass signals that were elaborated from the S-Plot, illustrated in Figure 2, B. The mass signal of diphloretoylputrescine was 383.197532 with calculated molecular formula of  $C_{22}H_{28}N_2O_4$ , which was annotated as [#16-Methoxy-2,3-dihydro-3-hydroxytabersonine ([M-H]<sup>-</sup>) #Rhynchophylline; Rhynchophylline ([M-H]<sup>-</sup>) #Isorhynchophylline ([M-H]<sup>-</sup>)] in MassTRIX, which was refused after carefully looking on the acquired MS/MS results, shown in Figure S2, A. The corresponding fragments of the daughter ion with their respective molecular formula are shown in Figure S2 A. The highest fragment (1) is assumed to be derived through a loss of hydroxycinnamylaldehyde of the precursor mass, resulting in (1) and the second fragment of (2). The fragment of (3) was presumed to be derived through C-N cleavage of the precursor mass and corresponding fragment (4). Finally, the possible structure, shown in Figure S2, B of  $C_{22}H_{28}N_2O_4$  could be assumed as the most plausible one, consisting of two molecules of hydroxyphenylpropionic acid (also known as phloretic acid or dihydroumaric acid) and a putrescine molecule as the linkage (Figure S2, B). This metabolite is likely derived due to enzymatic condensation of the carboxyl group of hydroxyphenylpropionic acid and aminogroup of putrescine and will be named diphloretoylputrescine.

# Figures

Figure S1

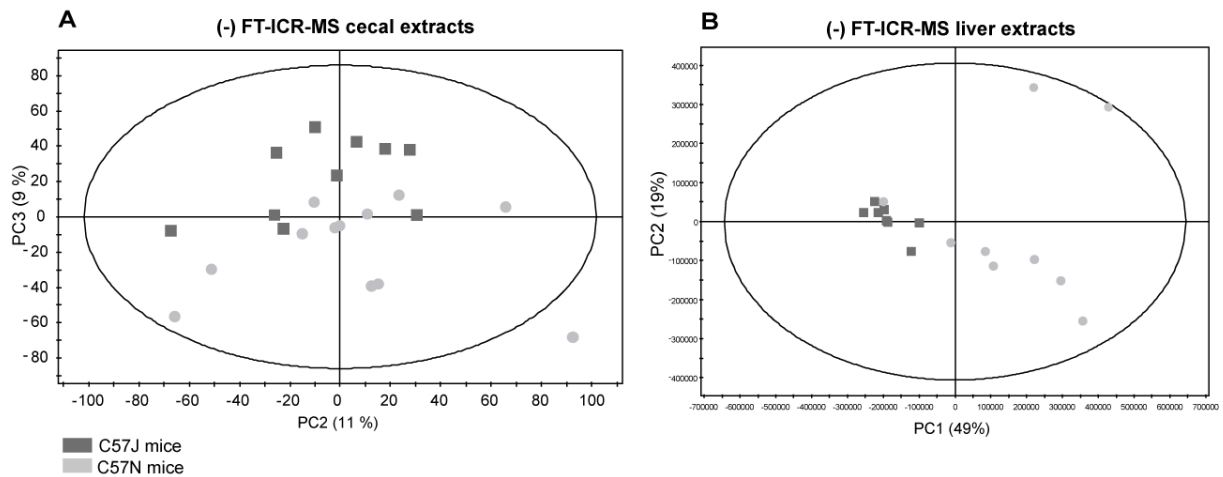

**Figure S1 Unsupervised multivariate analysis of cecal and liver extracts, measured in (-) FT-ICR-MS**

(A) Principal component analysis (PCA) score scatter plot from an unsupervised multivariate statistical model of cecal and liver samples (B) from C57J and C57N mice, derived from FT-ICR-MS data, points are colored according to the group of C57J (dark grey) and C57N (light grey) mice. The plot is showing a possible separation between the two classes by the second principal and third components with  $R^2X(\text{cum})=0.41$  and  $Q^2(\text{cum})=0.11$  for cecal samples (A). For liver metabolome a possible separation (B) was shown between the groups in first and second component with  $R^2X(\text{cum})=0.68$  and  $Q^2(\text{cum})=0.53$ .

Figure S2

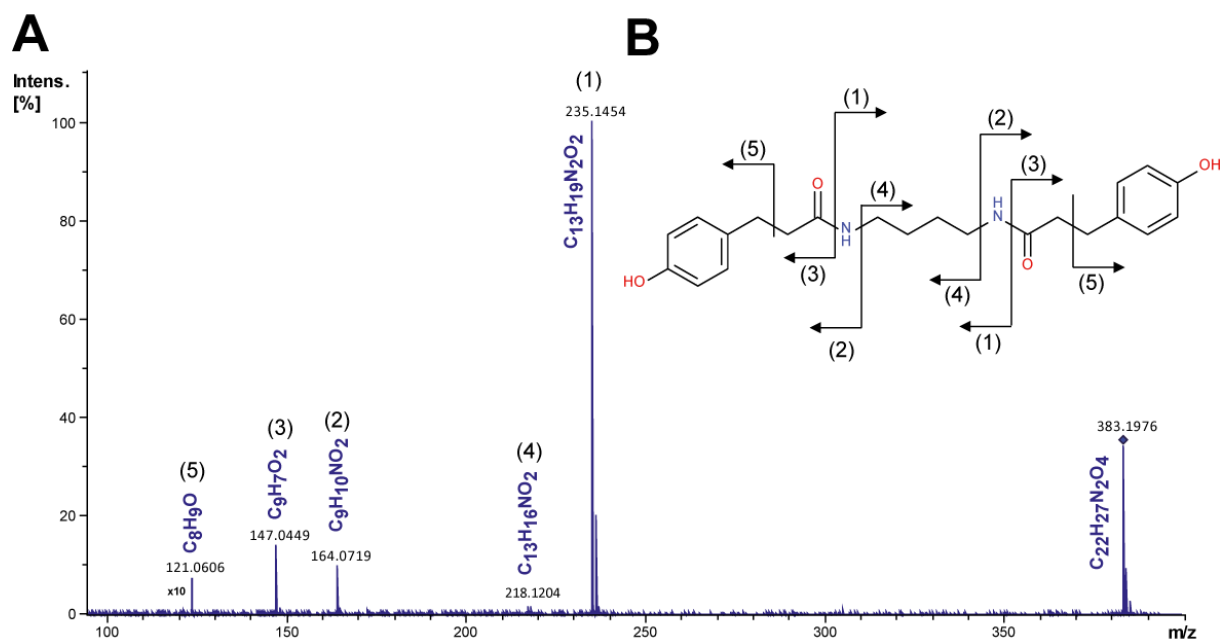

Figure S2 Identification of diphlyretoylputrescine

(A) MS/MS of the novel metabolite called diphlyretoylputrescine; (B) Most plausible structure of the diphlyretoylputrescine

Figure S3

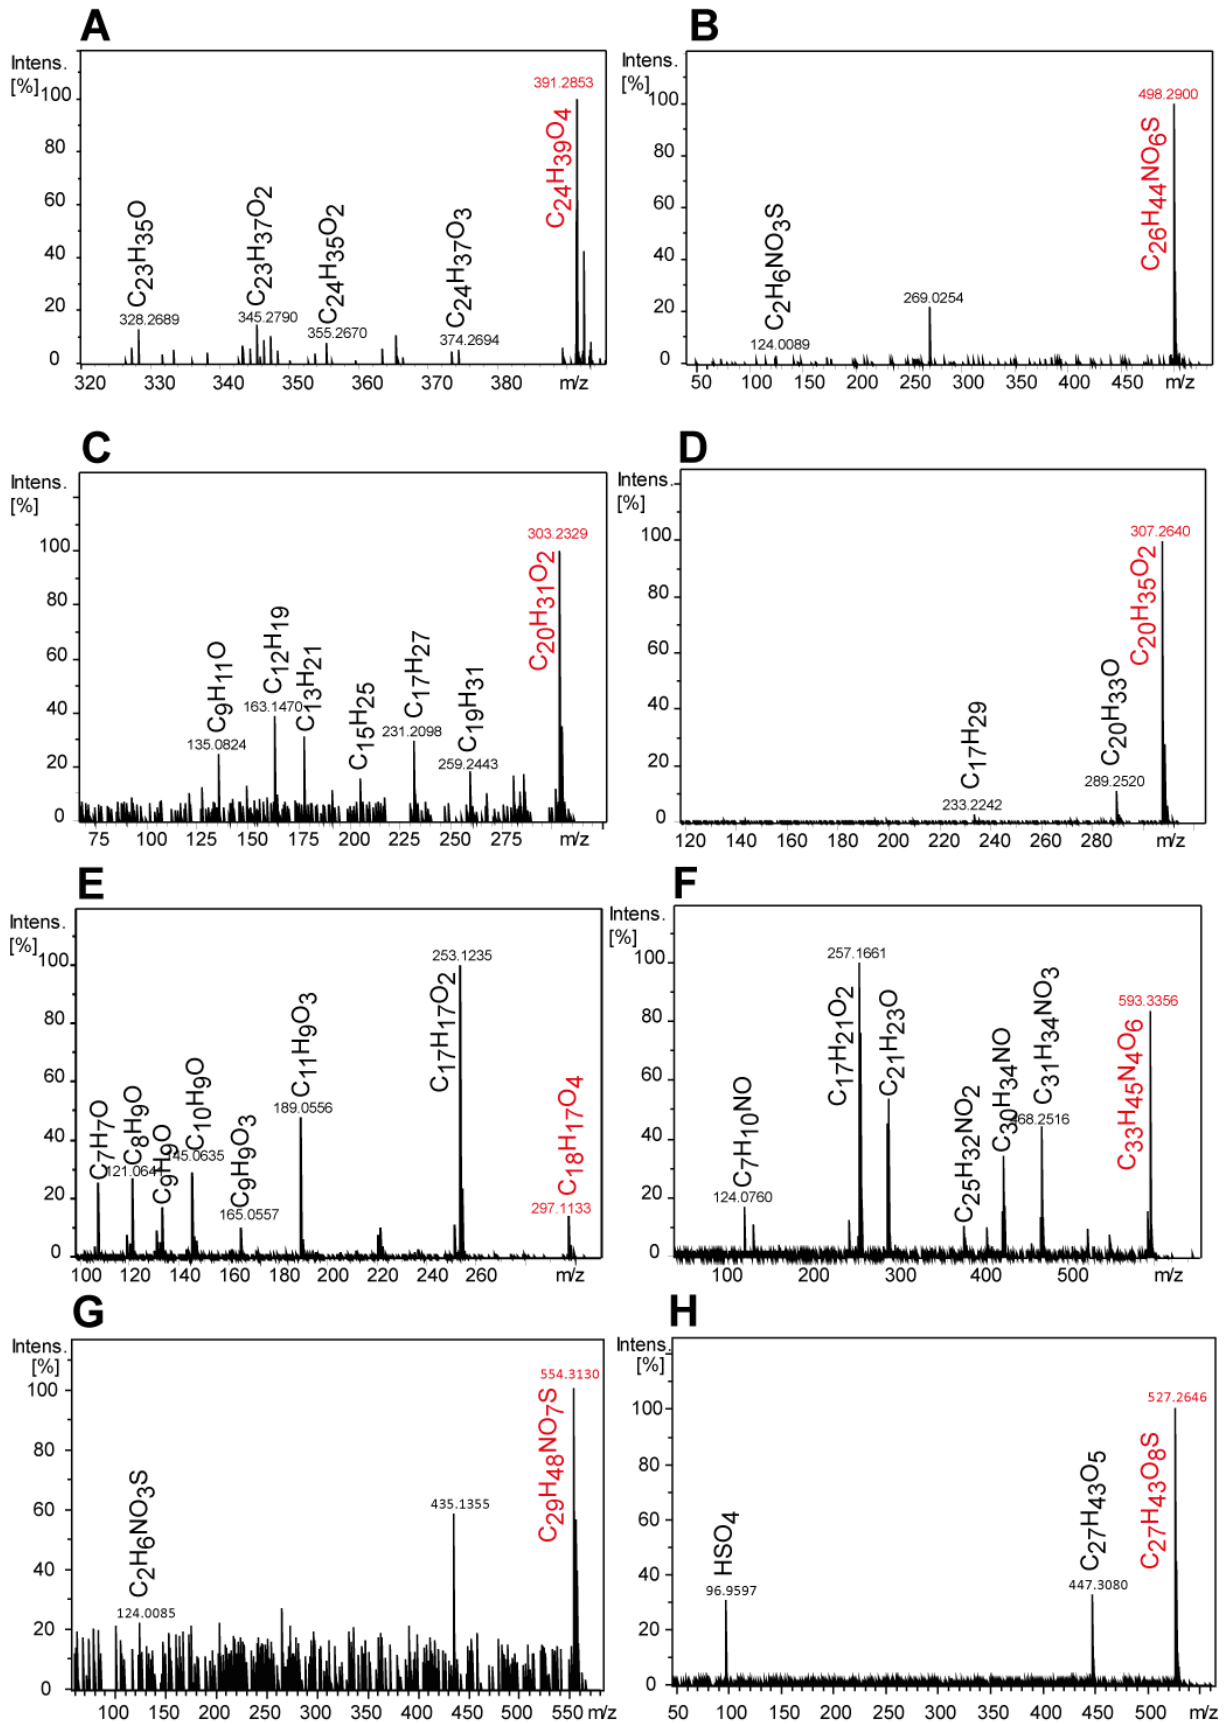



**Figure S3 Selected MS/MS of eight metabolites, represented each class of described cecal metabolites:**

(A) Deoxycholic acid, (B) Taurodeoxycholic acid, (C) Arachidonic acid (C20:4), (D) Eicosadienoic acid (C20:2); (E) Enterolactone, (F) L-Urobilin, (G) Taurodihydroxycholestanic acid, (H) Dihydroxyoxocholestanic acid sulfate: MS/MS experiments are performed in negative mode of the TOF-MS instrument, molecular formulas of parent and fragment ions were calculating using SmartFormula function of DataAnalysis; molecular formulas are displayed as deprotonated species.

# Tables

**Table S1**

Mean relative abundances of sequences at the family level showing significant differences between cecum samples of C57J and C57N mice

| <b>Family</b>              | <b>C57N mice<br/>[%]</b> | <b>C57J mice<br/>[%]</b> | <b>p-value</b> | <b>adj. p-<br/>value</b> |
|----------------------------|--------------------------|--------------------------|----------------|--------------------------|
| <i>Ruminococcaceae</i>     | 35.4                     | 15.4                     | 0.0002         | 0.0043                   |
| <i>Helicobacteraceae</i>   | 0.7                      | 10                       | 0.0004         | 0.0044                   |
| <i>Erysipelotrichaceae</i> | 1.4                      | 14.4                     | 0.0008         | 0.006                    |
| <i>Bacteroidaceae</i>      | 1.4                      | 17.5                     | 0.0025         | 0.0127                   |
| <i>Deferribacteraceae</i>  | 10.5                     | 2.6                      | 0.0032         | 0.0139                   |

**Table S2** Overview of percentages and p-values of highest abundant OTUs between the cecum samples of the two mouse strains.

Taxonomic assignment was based on RDP trainset 7, similarities with the closest cultivated relatives was calculated in ARB database after alignment with SINA aligner

| OTU Nr. | C57N mice [%] | C57J mice [%] | p-value <sup>a</sup> | p-value [adj.] <sup>b</sup> | Taxonomic assignment   |                              |                           |                            |                                     | Closest cultivated relative similarity [%]                                           | ACC number                       |
|---------|---------------|---------------|----------------------|-----------------------------|------------------------|------------------------------|---------------------------|----------------------------|-------------------------------------|--------------------------------------------------------------------------------------|----------------------------------|
|         |               |               |                      |                             | Phylum                 | Class                        | Order                     | Family                     | Genus                               |                                                                                      |                                  |
| Otu6    | 0             | 11.2          | 0.0001               | 0.00805                     | <i>Firmicutes</i>      | <i>Erysipelotrichia</i>      | <i>Erysipelotrichales</i> | <i>Erysipelotrichaceae</i> | <i>Erysipelotrichaceae_inc.sed.</i> | <i>Allobaculum stercoricanis</i> [91.8]                                              | AJ417075                         |
| Otu2    | 1             | 12.5          | 0.0018               | 0.01656                     | <i>Bacteroidetes</i>   | <i>Bacteroidia</i>           | <i>Bacteroidales</i>      | <i>Bacteroidaceae</i>      | <i>Bacteroides</i>                  | <i>B. fluxus</i> [100];<br><i>B. uniformis</i> [99.5];<br><i>B. rodentium</i> [99.5] | AB490802<br>AB510711<br>AB531489 |
| Otu12   | 0.3           | 4.4           | 0.0008               | 0.01309                     | <i>Bacteroidetes</i>   | <i>Bacteroidia</i>           | <i>Bacteroidales</i>      | <i>Bacteroidaceae</i>      | <i>Bacteroides</i>                  | <i>B. acidifaciens</i> [100];<br><i>B. xylanisolvans</i> [100]                       | EU136694<br>AB510713             |
| Otu5    | 0.7           | 9.7           | 0.0006               | 0.01263                     | <i>Proteobacteria</i>  | <i>Epsilonproteobacteria</i> | <i>Campylobacteriales</i> | <i>Helicobacteraceae</i>   | <i>Helicobacter</i>                 | <i>H. hepaticus</i> [100];<br><i>H. bilis</i> [97.9]                                 | AJ007931<br>AY578097             |
| Otu1    | 15.8          | 6.4           | 0.0011               | 0.01309                     | <i>Firmicutes</i>      | <i>Clostridia</i>            | <i>Clostridiales</i>      | <i>Ruminococcaceae</i>     | <i>Pseudo-flavonifractor</i>        |                                                                                      |                                  |
| Otu9    | 3.1           | 1             | 0.005                | 0.02559                     | <i>Firmicutes</i>      | <i>Clostridia</i>            | <i>Clostridiales</i>      | <i>Ruminococcaceae</i>     | <i>Anaerotruncus</i>                | <i>Anaerotruncus colihominis</i> [95.9]                                              | ABGD02000031                     |
| Otu3    | 9.9           | 2.5           | 0.0042               | 0.02262                     | <i>Deferribacteres</i> | <i>Deferribacteres</i>       | <i>Deferribacterales</i>  | <i>Deferribacteraceae</i>  | <i>Mucispirillum</i>                | <i>Mucispirillum schaedleri</i> [100]                                                | AY387670                         |

a: p- values were calculated by using a non-parametric univariate statistical test Wilcoxon-Mann-Whitney test; b: multiple testing corrected by Benjamini-Hochberg algorithm

**Table S3** Summary with detailed information of putative metabolites that are significantly changed between C57J and C57N mice concerning cecal and liver metabolites displayed in Figure 3 - 5

| Cecal metabolites                                   | Mass (avg.) | Compound Name                        | Monoisotopic mass | C57J mice (n=10) | C57N mice (n=12) | p-value  | Molecular Formula                                                            |
|-----------------------------------------------------|-------------|--------------------------------------|-------------------|------------------|------------------|----------|------------------------------------------------------------------------------|
| <b>C24 Bile acids</b>                               |             |                                      |                   |                  |                  |          |                                                                              |
|                                                     | 355.264269  | Cholandiolic acid                    | 356.271516        | 1.14E+07         | 7.05E+06         | 0.029559 | C <sub>24</sub> H <sub>40</sub> O <sub>7</sub>                               |
|                                                     | 371.259162  | Oxocholanic acid                     | 372.266431        | 2.45E+07         | 1.56E+07         | 0.003005 | C <sub>24</sub> H <sub>38</sub> O <sub>7</sub>                               |
|                                                     | 373.274756  | Oxocholanic acid                     | 374.28208         | 9.79E+07         | 6.65E+07         | n.s.     | C <sub>24</sub> H <sub>38</sub> O <sub>7</sub>                               |
|                                                     | 375.29046   | Lithocholic acid                     | 376.297729        | 1.49E+09         | 9.91E+08         | n.s.     | C <sub>24</sub> H <sub>38</sub> O <sub>7</sub>                               |
|                                                     | 391.285157  | Deoxycholic acid                     | 392.292644        | 1.57E+10         | 9.36E+09         | 0.024968 | C <sub>24</sub> H <sub>36</sub> O <sub>7</sub>                               |
|                                                     | 401.233323  | Troxocholanic acid                   | 402.240811        | 1.65E+07         | 1.89E+07         | 0.024968 | C <sub>24</sub> H <sub>36</sub> O <sub>7</sub>                               |
|                                                     | 407.280086  | Cholic acid                          | 408.287559        | 8.58E+09         | 7.69E+09         | n.s.     | C <sub>24</sub> H <sub>40</sub> O <sub>8</sub>                               |
|                                                     | 421.259526  | Trihydroxyoxocholanic acid           | 422.266825        | 2.18E+08         | 2.62E+08         | 0.004578 | C <sub>24</sub> H <sub>38</sub> O <sub>8</sub>                               |
|                                                     | 423.275108  | Tetrahydroxycholanic acid            | 424.282474        | 5.43E+08         | 7.15E+08         | 0.017608 | C <sub>24</sub> H <sub>36</sub> O <sub>8</sub>                               |
| <b>C<sub>24</sub> Taurine conjugated Bile acids</b> |             |                                      |                   |                  |                  |          |                                                                              |
|                                                     | 478.263234  | Taurooxocholanic acid*               | 479.27053         | 5.51E+06         | 1.04E+06         | 0.006300 | C <sub>24</sub> H <sub>40</sub> O <sub>8</sub> N <sub>2</sub> S <sub>2</sub> |
|                                                     | 480.278841  | Taurooxocholanic acid*               | 481.286179        | 7.49E+06         | 1.20E+06         | 0.024220 | C <sub>24</sub> H <sub>40</sub> O <sub>8</sub> N <sub>2</sub> S <sub>2</sub> |
|                                                     | 482.294473  | Tauroolithocholic acid               | 483.301628        | 1.20E+07         | 1.78E+06         | 0.013170 | C <sub>24</sub> H <sub>40</sub> O <sub>8</sub> N <sub>2</sub> S <sub>2</sub> |
|                                                     | 494.25797   | Taurodoxocholanic acid*              | 495.265445        | 1.65E+07         | 4.78E+06         | 0.004580 | C <sub>24</sub> H <sub>38</sub> O <sub>8</sub> N <sub>2</sub> S <sub>2</sub> |
|                                                     | 496.273817  | Taurohydroxyoxocholanic acid*        | 497.281094        | 1.27E+08         | 3.75E+07         | 0.014700 | C <sub>24</sub> H <sub>40</sub> O <sub>8</sub> N <sub>2</sub> S <sub>2</sub> |
|                                                     | 498.289477  | Taurodeoxycholic acid                | 499.296743        | 5.34E+08         | 2.25E+08         | 0.005620 | C <sub>24</sub> H <sub>38</sub> O <sub>8</sub> N <sub>2</sub> S <sub>2</sub> |
|                                                     | 510.252936  | Taurohydroxydoxocholanic acid*       | 511.26036         | 1.95E+07         | 7.31E+06         | 0.001230 | C <sub>24</sub> H <sub>40</sub> O <sub>8</sub> N <sub>2</sub> S <sub>2</sub> |
|                                                     | 514.284132  | Taurocholic acid                     | 515.291658        | 3.88E+09         | 1.10E+09         | 0.004580 | C <sub>24</sub> H <sub>40</sub> O <sub>9</sub> N <sub>2</sub> S <sub>2</sub> |
|                                                     | 530.279358  | Taurotetrahydroxycholanic acid*      | 531.286573        | 5.93E+07         | 8.37E+06         | 0.006320 | C <sub>24</sub> H <sub>38</sub> O <sub>9</sub> N <sub>2</sub> S <sub>2</sub> |
|                                                     | 594.240876  | Taurocholic acid 3-sulfate           | 595.248475        | 6.92E+07         | 2.92E+05         | 0.006710 | C <sub>24</sub> H <sub>40</sub> O <sub>9</sub> N <sub>2</sub> S <sub>2</sub> |
| <b>Other conjugated C24 Bile acids</b>              |             |                                      |                   |                  |                  |          |                                                                              |
|                                                     | 448.306922  | Glycodeoxycholic acid                | 449.314107        | 1.66E+06         | 1.00E+06         | 0.01869  | C <sub>24</sub> H <sub>40</sub> O <sub>9</sub> N <sub>2</sub>                |
|                                                     | 464.301993  | Glycocholic acid                     | 465.309022        | 8.09E+06         | 2.12E+06         | 0.03425  | C <sub>24</sub> H <sub>40</sub> NO <sub>9</sub>                              |
|                                                     | 512.268599  | Sulfolithocholylglycine              | 513.276009        | 2.02E+08         | 1.08E+08         | 0.00686  | C <sub>24</sub> H <sub>40</sub> O <sub>9</sub> N <sub>2</sub> S <sub>2</sub> |
|                                                     | 544.258192  | Sulfolithocholylglycine              | 545.265839        | 8.95E+06         | 1.40E+06         | 0.00093  | C <sub>24</sub> H <sub>40</sub> O <sub>9</sub> N <sub>2</sub> S <sub>2</sub> |
| <b>C<sub>27</sub> Taurine conjugated Bile acids</b> |             |                                      |                   |                  |                  |          |                                                                              |
|                                                     | 520.309819  | Taurodihydrocholestenic acid*        | 521.317477        | 2.09E+06         | 2.91E+05         | 0.02600  | C <sub>27</sub> H <sub>40</sub> O <sub>8</sub> N <sub>2</sub> S <sub>2</sub> |
|                                                     | 522.325673  | Taurocholestenic acid*               | 523.333126        | 5.65E+06         | 1.16E+06         | 0.01058  | C <sub>27</sub> H <sub>40</sub> O <sub>8</sub> N <sub>2</sub> S <sub>2</sub> |
|                                                     | 536.30475   | Taurodioxocholestenic acid           | 537.312392        | 8.13E+06         | 7.68E+05         | 0.00397  | C <sub>27</sub> H <sub>38</sub> O <sub>8</sub> N <sub>2</sub> S <sub>2</sub> |
|                                                     | 538.320689  | Taurodihydroxycholestenic acid       | 539.328041        | 2.31E+07         | 3.57E+06         | 0.00457  | C <sub>27</sub> H <sub>40</sub> O <sub>8</sub> N <sub>2</sub> S <sub>2</sub> |
|                                                     | 540.336074  | Taurodihydroxycholestenic acid       | 541.343691        | 1.58E+07         | 3.69E+06         | 0.00457  | C <sub>27</sub> H <sub>40</sub> O <sub>8</sub> N <sub>2</sub> S <sub>2</sub> |
|                                                     | 552.29969   | Taurodihydroxyoxocholestenic acid    | 553.307307        | 1.02E+07         | 1.54E+06         | 0.00736  | C <sub>27</sub> H <sub>40</sub> O <sub>8</sub> N <sub>2</sub> S <sub>2</sub> |
|                                                     | 554.31551   | Taurodihydroxycholestenic acid       | 555.322956        | 4.06E+07         | 4.26E+06         | 0.00372  | C <sub>27</sub> H <sub>40</sub> O <sub>8</sub> N <sub>2</sub> S <sub>2</sub> |
|                                                     | 556.330806  | Taurotrihydroxycholestenic acid      | 557.338606        | 2.49E+07         | 3.79E+06         | 0.02253  | C <sub>27</sub> H <sub>38</sub> NO <sub>8</sub> S <sub>2</sub>               |
|                                                     | 570.310353  | Taurotetrahydroxycholestenic acid    | 571.317871        | 1.19E+07         | 1.43E+06         | 0.00774  | C <sub>27</sub> H <sub>40</sub> O <sub>9</sub> N <sub>2</sub> S <sub>2</sub> |
|                                                     | 572.326197  | Taurotetrahydroxycholestenic acid    | 573.333521        | 6.63E+06         | 1.33E+06         | 0.04102  | C <sub>27</sub> H <sub>38</sub> O <sub>9</sub> N <sub>2</sub> S <sub>2</sub> |
| <b>Sulfates of C<sub>27</sub> Bile acids</b>        |             |                                      |                   |                  |                  |          |                                                                              |
|                                                     | 511.273369  | Dihydroxycholestenic acid sulfate    | 512.280759        | 1.06E+08         | 7.57E+07         | 0.0176   | C <sub>27</sub> H <sub>40</sub> O <sub>9</sub> S <sub>2</sub>                |
|                                                     | 527.268213  | Dihydroxyoxocholestenic acid sulfate | 528.275674        | 9.67E+08         | 6.10E+08         | 0.0296   | C <sub>27</sub> H <sub>38</sub> O <sub>9</sub> S <sub>2</sub>                |
| <b>Fatty acids</b>                                  |             |                                      |                   |                  |                  |          |                                                                              |
|                                                     | 297.279888  | Pristanic acid                       | 298.28717         | 2.27E+08         | 2.75E+08         | 0.02497  | C <sub>27</sub> H <sub>54</sub> O <sub>2</sub>                               |
|                                                     | 299.201633  | Retinoic Acid                        | 300.208919        | 5.40E+07         | 2.74E+07         | 0.00686  | C <sub>27</sub> H <sub>44</sub> O <sub>2</sub>                               |
|                                                     | 301.217207  | Eicosapentaenoic acid (C20:5)        | 302.224568        | 5.46E+07         | 2.81E+07         | 0.001761 | C <sub>27</sub> H <sub>44</sub> O <sub>2</sub>                               |
|                                                     | 303.232832  | Arachidonic Acid (C20:4)             | 304.240217        | 2.96E+09         | 9.30E+08         | 0.01761  | C <sub>27</sub> H <sub>42</sub> O <sub>2</sub>                               |
|                                                     | 307.264205  | Eicosadienoic acid (C20:2)           | 308.271516        | 2.01E+09         | 3.69E+09         | 0.0101   | C <sub>27</sub> H <sub>42</sub> O <sub>2</sub>                               |
|                                                     | 319.227887  | Hydroxyeicosatetraenoic acid         | 320.235132        | 2.68E+07         | 1.42E+07         | 0.0084   | C <sub>27</sub> H <sub>40</sub> O <sub>2</sub>                               |
|                                                     | 327.33001   | Docosahexanoic acid (C22:6)          | 328.340217        | 5.76E+08         | 1.59E+08         | 0.0122   | C <sub>27</sub> H <sub>44</sub> O <sub>2</sub>                               |
|                                                     | 333.279892  | Docosatrienoic acid (C22:3)          | 334.287165        | 9.55E+07         | 3.03E+08         | 0.0019   | C <sub>27</sub> H <sub>42</sub> O <sub>2</sub>                               |
|                                                     | 335.222773  | Leukotriene B <sub>4</sub>           | 336.230047        | 4.92E+07         | 2.45E+07         | 0.0046   | C <sub>27</sub> H <sub>40</sub> O <sub>2</sub>                               |
|                                                     | 335.295584  | Docosadienoic acid (C22:2)           | 336.302814        | 7.78E+07         | 1.14E+08         | 0.02101  | C <sub>27</sub> H <sub>40</sub> O <sub>2</sub>                               |
|                                                     | 351.21769   | Hydroxy Leukotriene B <sub>4</sub>   | 352.224974        | 5.72E+08         | 2.99E+08         | 0.01470  | C <sub>27</sub> H <sub>40</sub> O <sub>2</sub>                               |
| <b>Endocannabinoids</b>                             |             |                                      |                   |                  |                  |          |                                                                              |
|                                                     | 324.290713  | N-Oleylethanolamine                  | 325.298063        | 5.25E+06         | 1.31E+07         | 0.029560 | C <sub>27</sub> H <sub>48</sub> O <sub>2</sub> N <sub>2</sub>                |
|                                                     | 326.306606  | Stearylethanolamine                  | 327.313713        | 1.24E+07         | 3.29E+07         | 0.006860 | C <sub>27</sub> H <sub>48</sub> NO <sub>2</sub>                              |
|                                                     | 352.322932  | Arachidamide (20:1)                  | 353.329362        | 8.98E+06         | 1.42E+07         | 0.017610 | C <sub>27</sub> H <sub>48</sub> O <sub>2</sub> N <sub>2</sub>                |
|                                                     | 390.353453  | Enicocetylthanolamine                | 391.360665        | 5.69E+06         | 1.73E+06         | 0.02210  | C <sub>27</sub> H <sub>48</sub> O <sub>2</sub> N <sub>2</sub>                |
|                                                     | 410.236976  | N-arachidonoylaurine                 | 411.2443          | 7.64E+06         | 5.91E+05         | 0.032172 | C <sub>27</sub> H <sub>48</sub> NO <sub>2</sub> S                            |
|                                                     | 435.25176   | Lysophosphatidic Acid (18:1)         | 436.258977        | 9.42E+06         | 2.10E+07         | 0.004530 | C <sub>27</sub> H <sub>48</sub> O <sub>2</sub> P <sub>2</sub>                |
| <b>Urobilinoids</b>                                 |             |                                      |                   |                  |                  |          |                                                                              |
|                                                     | 583.25568   | Bilirubin                            | 584.263472        | 2.37E+07         | 2.92E+07         | n.s.     | C <sub>27</sub> H <sub>48</sub> N <sub>2</sub> O <sub>6</sub>                |
|                                                     | 587.28717   | D-Urobilin                           | 588.29477         | 2.69E+06         | 8.17E+06         | 0.006980 | C <sub>27</sub> H <sub>48</sub> N <sub>2</sub> O <sub>6</sub>                |
|                                                     | 589.30305   | D-Urobilinogen                       | 590.310419        | 2.04E+07         | 1.06E+08         | 0.014670 | C <sub>27</sub> H <sub>48</sub> N <sub>2</sub> O <sub>6</sub>                |
|                                                     | 591.31879   | L-Urobilinogen                       | 592.326988        | 2.12E+08         | 6.32E+08         | 0.012220 | C <sub>27</sub> H <sub>48</sub> N <sub>2</sub> O <sub>6</sub>                |
|                                                     | 593.33436   | L-Urobilin                           | 594.341718        | 5.20E+08         | 9.73E+08         | 0.024970 | C <sub>27</sub> H <sub>48</sub> N <sub>2</sub> O <sub>6</sub>                |
|                                                     | 595.34993   | L-Urobilinogen                       | 596.357367        | 5.05E+07         | 9.64E+07         | 0.021010 | C <sub>27</sub> H <sub>48</sub> N <sub>2</sub> O <sub>6</sub>                |
| <b>Phenyl containing metabolites</b>                |             |                                      |                   |                  |                  |          |                                                                              |
|                                                     | 297.113129  | Enterolactone                        | 298.1205028       | 1064943510       | 544119521.7      | 0.034857 | C <sub>27</sub> H <sub>40</sub> O <sub>2</sub>                               |
|                                                     | 301.144571  | Enterodiol                           | 302.151809        | 29490958.7       | 14861003.58      | 0.003551 | C <sub>27</sub> H <sub>40</sub> O <sub>2</sub>                               |
|                                                     | 383.197532  | Diphloretylputrescine                | 384.2048968       | 88953507.4       | 155890.25        | 0.000117 | C <sub>27</sub> H <sub>48</sub> N <sub>2</sub> O <sub>4</sub>                |
| <b>Alpha oxidation metabolites</b>                  |             |                                      |                   |                  |                  |          |                                                                              |
|                                                     | 285.300709  | Phytol                               | 296.307916        | 20013279         | 38160069.5       | 0.014699 | C <sub>27</sub> H <sub>54</sub> O                                            |
|                                                     | 297.279888  | Pristanic acid                       | 298.28717         | 227472118.4      | 27536008         | 0.024968 | C <sub>27</sub> H <sub>54</sub> O <sub>2</sub>                               |
|                                                     | 311.295613  | Phytanic acid                        | 312.302831        | 1142037498       | 1048226437       | 0.468257 | C <sub>27</sub> H <sub>54</sub> O <sub>2</sub>                               |
|                                                     | 327.290557  | Hydroxylphytanic acid                | 328.297745        | 152262240        | 137092838.3      | 0.843191 | C <sub>27</sub> H <sub>54</sub> O <sub>2</sub>                               |
| <b>Liver metabolites</b>                            |             |                                      |                   |                  |                  |          |                                                                              |
| Compound class                                      | Mass (avg.) | Compound Name                        | Monoisotopic mass | C57J mice (n=9)  | C57N mice (n=9)  | p-value  | Molecular Formula                                                            |
| <b>C<sub>24</sub> Bile acids</b>                    |             |                                      |                   |                  |                  |          |                                                                              |
|                                                     | 355.264264  | Cholandiolic acid                    | 356.271516        | 17263469.22      | 26538010.44      | 0.0071   | C <sub>24</sub> H <sub>40</sub> O <sub>7</sub>                               |
|                                                     | 421.259583  | Trihydroxyoxocholanic acid           | 422.266825        | 2922257.778      | 507906.444       | 0.0379   | C <sub>24</sub> H <sub>38</sub> O <sub>7</sub>                               |
|                                                     | 423.27525   | Tetrahydroxycholanic acid            | 424.282474        | 5331722.444      | 9031965.778      | 0.0092   | C <sub>24</sub> H <sub>36</sub> O <sub>7</sub>                               |
| <b>C<sub>24</sub> Taurine conjugated Bile acids</b> |             |                                      |                   |                  |                  |          |                                                                              |
|                                                     | 478.263312  | Taurooxocholanic acid*               | 479.27053         | 5748338.889      | 11983061.44      | 0.0013   | C <sub>24</sub> H <sub>40</sub> O <sub>8</sub> N <sub>2</sub> S <sub>2</sub> |
|                                                     | 480.278958  | Taurooxocholanic acid*               | 481.286179        | 9290278.889      | 16690640.56      | 0.0031   | C <sub>24</sub> H <sub>40</sub> O <sub>8</sub> N <sub>2</sub> S <sub>2</sub> |
|                                                     | 482.294598  | Tauroolithocholic acid               | 483.301628        | 16849687.56      | 25794985         | 0.0017   | C <sub>24</sub> H <sub>40</sub> O <sub>8</sub> N <sub>2</sub> S <sub>2</sub> |
|                                                     | 494.258236  | Taurodoxocholanic acid*              | 495.265445        | 17022386.44      | 6778292.22       | 0.0017   | C <sub>24</sub> H <sub>38</sub> O <sub>8</sub> N <sub>2</sub> S <sub>2</sub> |
|                                                     | 496.273915  | Taurohydroxyoxocholanic acid*        | 497.281094        | 148457734.7      | 653905144.9      | 0.0041   | C <sub>24</sub> H <sub>40</sub> O <sub>8</sub> N <sub>2</sub> S <sub>2</sub> |
|                                                     | 498.289549  | Taurodeoxycholic acid                | 499.296743        | 1467297301       | 5015382734       | 0.0054   | C <sub>24</sub> H <sub>38</sub> O <sub>8</sub> N <sub>2</sub> S <sub>2</sub> |
|                                                     | 510.253166  | Taurohydroxydoxocholanic acid*       | 511.26036         | 21612837.78      | 86546642         | 0.0023   | C <sub>24</sub> H <sub>40</sub> O <sub>8</sub> N <sub>2</sub> S <sub>2</sub> |
|                                                     | 514.284366  | Taurocholic acid                     | 515.291658        | 6824737109       | 32619840256      | 0.0031   | C <sub>24</sub> H <sub>40</sub> O <sub>9</sub> N <sub>2</sub> S <sub>2</sub> |
|                                                     | 530.279368  | Taurotetrahydroxycholanic acid*      | 531.286573        | 2072402.11       | 68405396.22      | 0.0071   | C <sub>24</sub> H <sub>38</sub> O <sub>9</sub> N <sub>2</sub> S <sub>2</sub> |
|                                                     | 594.241164  | Taurocholic acid 3-sulfate           | 595.248475        | 860191.1111      | 5388764          | 0.0023   | C <sub>24</sub> H <sub>40</sub> O <sub>9</sub> N <sub>2</sub> S <sub>2</sub> |
|                                                     | 471.242178  | Sulfodeoxycholic acid                | 472.249461        | 0                | 2691166.556      | 0.0045   | C <sub>24</sub> H <sub>40</sub> O <sub>8</sub> S <sub>2</sub>                |
|                                                     | 512.268788  | Sulfolithocholylglycine              | 513.276009        | 58272987.6       | 1710337072       | 0.0071   | C <sub>24</sub> H <sub>40</sub> O <sub>8</sub> N <sub>2</sub> S <sub>2</sub> |
|                                                     | 528.263706  | Sulfodeoxycholylglycine              | 529.270924        | 6083828.778      | 19780599.44      | 0.0041   | C <sub>24</sub> H <sub>38</sub> O <sub>8</sub> N <sub>2</sub> S <sub>2</sub> |
| <b>C<sub>27</sub> Bile acids</b>                    |             |                                      |                   |                  |                  |          |                                                                              |
|                                                     | 433.332423  | Dihydroxycholestenic acid            | 434.33961         | 3418680          | 1469676.667      | 0.0052   | C <sub>27</sub> H <sub>40</sub> O <sub>8</sub>                               |
|                                                     | 465.322061  | Tetrahydroxycholestenic acid         | 466.329439        | 1033347.78       | 16274843.56      | 0.0092   | C <sub>27</sub> H <sub>38</sub> O <sub>8</sub>                               |
| <b>C<sub>27</sub> Taurine conjugated Bile acids</b> |             |                                      |                   |                  |                  |          |                                                                              |
|                                                     | 536.304948  | Taurodioxocholestenic acid*          | 537.312392        | 1468867.778      | 4333670.333      | 0.0034   | C <sub>27</sub> H <sub>40</sub> O <sub>8</sub> N <sub>2</sub> S <sub>2</sub> |
|                                                     | 538.320777  | Taurodihydroxycholestenic acid       | 539.328041        | 5055143.556      | 11447127.78      | 0.0031   | C <sub>27</sub> H <sub>40</sub> O <sub>8</sub> N <sub>2</sub> S <sub>2</sub> |
|                                                     | 540.336458  | Taurodihydroxycholestenic acid       | 541.343691        | 3020145.778      | 7982480.656      | 0.0054   | C <sub>27</sub> H <sub>40</sub> O <sub>8</sub> N <sub>2</sub> S <sub>2</sub> |
|                                                     | 552.300103  | Taurodihydroxyoxocholestenic acid*   | 553.3             |                  |                  |          |                                                                              |

**Table S4** Mass difference list used for generation of the mass difference network illustrated in Figure 6, B

| Name                     | Mass difference exact mass (theoretical) | Elemental composition CHNOSP                    |
|--------------------------|------------------------------------------|-------------------------------------------------|
| Hydrogenation            | 2.01565                                  | H <sub>2</sub>                                  |
| Sulfurdioxide            | 63.961903                                | SO <sub>2</sub>                                 |
| Methylation              | 14.01565                                 | CH <sub>2</sub>                                 |
| β-Oxidation              | 28.0313                                  | C <sub>2</sub> H <sub>4</sub>                   |
| Hydroxylation            | 15.994915                                | O                                               |
| Oxidation                | 13.979265                                | +O - H <sub>2</sub>                             |
| Glycine conjugation      | 57.021465                                | C <sub>2</sub> H <sub>3</sub> NO                |
| Homocysteine conjugation | 117.02483                                | C <sub>4</sub> H <sub>7</sub> NOS               |
| Taurine conjugation      | 107.0041                                 | C <sub>2</sub> H <sub>5</sub> NO <sub>2</sub> S |
| Water                    | 18.010565                                | H <sub>2</sub> O                                |
| Sulfur                   | 31.97207                                 | S                                               |
| Sulfonation              | 79.95682                                 | SO <sub>3</sub>                                 |
| Hypotaurine conjugation  | 91.009186                                | C <sub>2</sub> H <sub>5</sub> NOS               |
| Cysteine conjugation     | 103.009186                               | C <sub>3</sub> H <sub>5</sub> NOS               |
| Carboxylation            | 43.98983                                 | CO <sub>2</sub>                                 |
| Phosphorylation          | 79.96633                                 | HPO <sub>3</sub>                                |
| <sup>13</sup> C isotope  | 1.003355                                 | <sup>13</sup> C                                 |
| Glucosamination          | 163.08446                                | C <sub>6</sub> H <sub>13</sub> NO <sub>4</sub>  |
| Glucuronidation          | 176.03209                                | C <sub>6</sub> H <sub>8</sub> O <sub>6</sub>    |
| Glucose conjugation      | 162.05283                                | C <sub>6</sub> H <sub>10</sub> O <sub>5</sub>   |
| <sup>34</sup> S isotope  | 1.995796                                 | <sup>34</sup> S                                 |
| Tertiary amidation       | 14.003074                                | N                                               |
| Secondary amidation      | 15.010899                                | NH                                              |
| Primary amidation        | 16.018724                                | NH <sub>2</sub>                                 |

## References

Bastian M, Heymann S, Jacomy M (2009). *Gephi: An Open Source Software for Exploring and Manipulating Networks*.

Jinwook S, Shneiderman B (2002). Interactively exploring hierarchical clustering results [gene identification]. *Computer* **35**: 80-86.

Kanehisa M, Goto S (2000). KEGG: kyoto encyclopedia of genes and genomes. *Nucleic acids research* **28**: 27-30.

Smith CA, Maille GO, Want EJ, Qin C, Trauger SA, Brandon TR *et al* (2005). METLIN: A Metabolite Mass Spectral Database. *Therapeutic Drug Monitoring* **27**: 747-751.

Sud M, Fahy E, Cotter D, Brown A, Dennis EA, Glass CK *et al* (2007). LMSD: LIPID MAPS structure database. *Nucleic Acids Research* **35**: D527-D532.

Suhre K, Schmitt-Kopplin P (2008). MasSTRIX: mass translator into pathways. *Nucleic acids research* **36**: W481-484.

Tziotis D, Hertkorn N, Schmitt-Kopplin P (2011). Kendrick-analogous network visualisation of ion cyclotron resonance Fourier transform mass spectra: improved options for the assignment of elemental compositions and the classification of organic molecular complexity. *Eur J Mass Spectrom* **17**: 415-421.

Wishart DS, Knox C, Guo AC, Eisner R, Young N, Gautam B *et al* (2009). HMDB: a knowledgebase for the human metabolome. *Nucleic Acids Research* **37**: D603-D610.
